# Supplementary material for: Exposure of Cryptococcus neoformans to Seven Commonly Used Agricultural Azole Fungicides Induces Resistance to Fluconazole as Well as Cross-Resistance to Voriconazole, Posaconazole, Itraconazole and Isavuconazole
Source: MDPI journal article supplement (doi:10.3390/pathogens12050662), 2023-04-29
Supplement: s1 [file s1]

| Clone        | Mean MIC to FCZ of the clone | ERG11       | AFR1         | AFR2        | MDR1        |
|--------------|------------------------------|-------------|--------------|-------------|-------------|
| DFZ 5 - ATF  | 24                           | 0,18+/-0,01 | 1,07+/-0,09  | 0,37+/-0,02 | 0,79+/-0,05 |
| DFZ 5 + ATF  | 24                           | 1,52+/-0,07 | 1,62+/-0,02  | 1,34+/-0,12 | 0,62+/-0,02 |
| DFZ 6 - ATF  | 24                           | 0,40+/-0,04 | 4,45+/-0,29  | 0,21+/-0,01 | 1,71+/-0,16 |
| DFZ 6 + ATF  | 24                           | 1,05+/-0,01 | 7,54+/-0,07  | 1,24+/-0,1  | 2,37+/-0,3  |
| DFZ 7 -ATF   | 44                           | 0,25+/-0,01 | 0,35+/-0,01  | 0,10+/-0,02 | 0,29+/-0,35 |
| DFZ 7 + ATF  | 44                           | 2,91+/-0,02 | 2,96+/-0,25  | 0,94+/-0,03 | 1,14+/-0,08 |
|              |                              |             |              |             |             |
| EPZ 20 – ATF | 16                           | 0,19+/-0,01 | 0,92+/-0,08  | 0,25+/-0,02 | 0,68+/-0,01 |
| EPZ 20 + ATF | 16                           | 2,13+/-0,03 | 1,21+/-0,02  | 0,85+/-0,09 | 1,06+/-0,02 |
| EPZ 29 -ATF  | 28                           | 0,37+/-0,02 | 0,66+/-0,02  | 0,40+/-0,01 | 1,23+/-0,02 |
| EPZ 29 + ATF | 28                           | 1,56+/-0,02 | 2,44+/-0,04  | 0,50+/-0,01 | 0,72+/-0,08 |
|              |                              |             |              |             |             |
| PNZ 3 - ATF  | 48                           | 0,26+/-0,01 | 4,36+/-0,05  | 0,34+/-0    | 1,52+/-0,01 |
| PNZ 3 + ATF  | 48                           | 1,61+/-0,01 | 15,73+/-1,44 | 2,15+/-0,15 | 3,64+/-0,3  |
| PNZ 29 – ATF | 24                           | 0,35+/-0,02 | 0,58+/-0,04  | 0,45+/-0,02 | 0,82+/-0,03 |
| PNZ 29 + ATF | 24                           | 1,65+/-0,1  | 1,06+/-0,02  | 0,98+/-0,04 | 0,52+/-0,01 |
| PNZ 30 - ATF | 20                           | 0,19+/-0,04 | 0,71+/-0,05  | 0,3+/-0,01  | 0,67+/-0,02 |
| PNZ 30 + ATF | 20                           | 1,95+/-0,43 | 1,84+/-0,13  | 0,5+/-0,02  | 0,37+/-0,2  |
|              |                              |             |              |             |             |
| TBZ 14 - ATF | 48                           | 0,25+/-0,01 | 2,32+/-0,14  | 0,35+/-0,02 | 1,62+/-0,08 |
| TBZ 14 + ATF | 48                           | 1,03+/-0,03 | 4,91+/-0,18  | 0,64+/-0    | 0,94+/-0,02 |
|              |                              |             |              |             |             |
| MTZ 11 – ATF | 16                           | 0,24+/-0,02 | 0,93+/-0,02  | 0,45+/-0,03 | 0,62+/-0,01 |
| MTZ 11 + ATF | 16                           | 1,09+/-0,04 | 1,59+/-0,05  | 0,81+/-0,01 | 0,71+/-0,04 |
|              |                              |             |              |             |             |
| BMZ 5 - ATF  | 24                           | 0,32+/-0,05 | 1,37+/-0,17  | 0,62+/-0,02 | 0,80+/-0,07 |
| BMZ 5 + ATF  | 24                           | 2,14+/-0,07 | 2,28+/-0,09  | 1,73+/-0,01 | 0,62+/-0,02 |
| BMZ 19 – ATF | 28                           | 0,11+/-0,01 | 1,06+/-0,03  | 0,07+/-0,02 | 1,30+/-0,02 |
| BMZ 19 + ATF | 28                           | 0,75+/-0,05 | 1,42+/-0,04  | 0,09+/-0,01 | 1,65+/-0,01 |
| BMZ 30 – ATF | 24                           | 0,21+/-0,01 | 0,83+/-0,01  | 0,42+/-0,01 | 0,59+/-0,04 |
| BMZ 30 + ATF | 24                           | 1,75+/-0,02 | 1,53+/-0,03  | 1,07+/-0,05 | 0,49+/-0,01 |
|              |                              |             |              |             |             |
| PTZ 4 - ATF  | 64                           | 1,27+/-0,07 | 2,51+/-0,07  | 0,43+/-0,01 | 0,90+/-0,02 |
| PTZ 4 + ATF  | 64                           | 1,97+/-0,03 | 4,18+/-0,22  | 0,52+/-0,01 | 1,50+/-0,02 |
| PTZ 7 - ATF  | 48                           | 0,80+/-0,03 | 1,77+/-0,13  | 0,95+/-0,02 | 1,48+/-0,03 |
| PTZ 7 + ATF  | 48                           | 2,53+/-0,2  | 6,61+/-0,4   | 5,76+/-0,02 | 6,48+/-0,2  |

|                |    |             |             |             |             |
|----------------|----|-------------|-------------|-------------|-------------|
| PTZ 8<br>- ATF | 20 | 0,35+/-0,02 | 0,37+/-0,03 | 0,32+/-0,01 | 0,57+/-0,03 |
| PTZ 8<br>+ ATF | 20 | 0,52+/-0,01 | 1+/-0,04    | 0,65+/-0,02 | 1,22+/-0,14 |
| PTZ 9<br>- ATF | 40 | 0,29+/-0,01 | 1,06+/-0,01 | 0,12+/-0,02 | 0,77+/-0,01 |
| PTZ 9<br>+ ATF | 40 | 0,84+/-0,01 | 1,74+/-0,2  | 0,27+/-0,03 | 0,90+/-0,1  |

**Table S2 Supplementary Data.** Gene expression of ERG11, AFR1, AFR2 and MDR1 of the various clones with a MIC for fluconazole >8µg/mL.

Levels of expression of ERG11, AFR1, AFR2 and MDR1 were evaluated in comparison with the expression of these same genes in the H99 control strain, in absence (-ATF) or presence (+ATF) of the pesticide used to obtain the tested isolates.

Squares in red indicate an over expression of the gene when the triazole pesticide used for selecting the clone was added to the culture in comparison with culture grown without pesticide. Blue squares indicate a decreased gene expression when the triazole pesticide used for selecting the clone was added to the culture in comparison with culture grown without pesticide. Grey square indicates the same level of expression of the gene when the triazole pesticide used for selecting the clone was added to the culture in comparison with culture grown without pesticide.

DFZ =difenoconazole, EPZ = epoxyconazole, PNZ =penconazole, TBZ = tebuconazole, MTZ = metconazole, BMZ = bromuconazole, PTZ= prothioconazole, FCZ=fluconazole
