# Supplementary material for: Exposure of Cryptococcus neoformans to Seven Commonly Used Agricultural Azole Fungicides Induces Resistance to Fluconazole as Well as Cross-Resistance to Voriconazole, Posaconazole, Itraconazole and Isavuconazole
Source: MDPI journal article supplement (doi:10.3390/pathogens12050662), 2023-04-29
Supplement: s1 [file s1]

|        | Mean MIC ATF 72h |        |        |       |       |       |       |
|--------|------------------|--------|--------|-------|-------|-------|-------|
| Clones | DFZ              | EPZ    | PNZ    | TBZ   | MTZ   | BMZ   | PTZ   |
| H99    | <0.03            | 0.075  | 0.375  | 0.125 | 0.045 | 0.075 | 0.075 |
| DFZ 5  | <0.03            | <0.03  | <0.03  | 0.5   | 0.06  | <0.03 | 0.5   |
| DFZ 6  | 0.125            | 0.0925 | 1.5    | 1     | 0.125 | 0.75  | 0.5   |
| DFZ 7  | 0.25             | 0.125  | 2      | 1     | 0.125 | 2     | 0.5   |
| EPZ 20 | 0.125            | 0.125  | 1      | 0.375 | 0.125 | 0.5   | 0.187 |
| EPZ 29 | <0.03            | 0.125  | 0.06   | 0.125 | 0.06  | <0.03 | <0.03 |
| PNZ 3  | 0.0925           | <0.03  | 0.5    | 0.25  | 0.045 | 0.5   | 0.25  |
| PNZ 29 | 0.045            | <0.03  | 0.06   | 0.125 | 0.06  | 0.06  | <0.03 |
| PNZ 30 | 0.06             | 0.125  | 0.375  | 0.25  | 0.125 | 0.5   | 0.25  |
| TBZ 14 | 0.125            | 0.125  | 3      | 1     | 0.25  | 2     | 0.5   |
| MTZ 11 | 0.0925           | 0.06   | 1      | 1     | 0.125 | 1     | 1     |
| BMZ 5  | 0.125            | 0.125  | 1      | 1     | 0.125 | 0.25  | 0.5-1 |
| BMZ 19 | <0.03            | <0.03  | 0.125  | <0.03 | 0.06  | 0.5   | 0.125 |
| BMZ 30 | <0.03            | <0.03  | 0.5    | 0.125 | <0.03 | 0.5   | 0.5   |
| PTZ 4  | 0.125            | 0.125  | 1      | 0.5   | 0.06  | 1     | 0.125 |
| PTZ 7  | <0.03            | <0.03  | <0.03  | <0.03 | <0.03 | 0.125 | <0.03 |
| PTZ 8  | 0.06             | 0.045  | 0.0925 | 0.06  | <0.03 | 0.06  | <0.03 |
| PTZ 9  | 0.1875           | 0.125  | 2      | 1     | 0.125 | 0.5   | 1     |

**Table S1 : Supplementary Data**

MICs of pesticide azole molecules for the clones with a resistant phenotype to FCZ selected by agropesticide contact

MIC for each clone was assessed by the CLSI M27A4 broth microdilution method in duplicate. Mean MIC value is the mean score obtained by averaging the four separate MIC to any antifungal for each clone.

Square in grey indicate indicate MIC values when the tested clone exposed to its antifungal of selection

DFZ =Difenoconazole, EPZ = Epoxyconazole, PNZ =Penconazole, TBZ = Tebuconazole, MTZ = Metconazole, BMZ = bromuconazole, PTZ= Prothioconazole
